# Supplementary material for: Event-Related Potential Correlates of Valence, Arousal, and Subjective Significance in Processing of an Emotional Stroop Task
Source: Frontiers journal article supplement (doi:10.3389/fnhum.2021.617861), 2021-02-25
Supplement: Table_1.XLS [file Table_1.XLS]

## Sheet: sheet 1 (words)
No.	polishword	englishword	Kazojć2011frequency	NumberofLetters	Valence_M	Valence_SD	arousal_M	arousal_SD	significance_M	significance_SD	LN.Kazojc_freq	Valence_rank	Arousal_rank	Significance_rank
1	klapa	flap	472	5	3.72	1.48516	3.54	1.94002	3.06	1.85615	6.15698	-1	-1	-1
2	koszmar	nightmare	1355	7	4.24	1.27071	3.6	1.91663	2.98	2.114	7.21156	-1	-1	-1
3	luka	gap	260	4	4.5	0.994885	3.12	1.74543	2.84	1.53011	5.56068	-1	-1	-1
4	mimoza	mimosa	37	6	4.28889	1.48664	2.72727	1.74361	2.48649	1.72597	3.61092	-1	-1	-1
5	mrzonka	daydream	45	7	4.28261	1.32771	3.66667	2.10706	3.26	2.20213	3.80666	-1	-1	-1
6	mydliny	suds	39	7	4.5625	1.31935	3.27083	1.89893	2.86	2.06041	3.66356	-1	-1	-1
7	partia	party	1270	6	4.46	1.4598	3.72	1.99018	3.36	2.07768	7.14677	-1	-1	-1
8	pchła	flea	84	5	3.3	1.46036	3.48	2.01261	2.9	2.03289	4.43082	-1	-1	-1
9	sekcja	section	362	6	4.6	1.57791	3.56	2.36609	3.24	2.22747	5.89164	-1	-1	-1
10	składowisko	dump	37	11	4.53061	1.25999	3.62	2.01919	3.12	2.10577	3.61092	-1	-1	-1
11	termit	termite	24	6	4.28	1.34073	3.64	1.9458	2.82	2.12555	3.17805	-1	-1	-1
12	wąsy	mustache	1453	4	4.68	1.54444	3.22	1.96178	2.68	1.78931	7.28139	-1	-1	-1
13	wygięcie	dent	66	8	4.34	0.847806	3.38	1.86142	3.18	1.97629	4.18965	-1	-1	-1
14	zakrystian	sexton	119	10	4.63158	1.12517	3.25	1.85679	2.91304	2.50179	4.77912	-1	-1	-1
15	zero	zero	1693	4	4.02	1.5451	3	2.1571	3.12	2.0863	7.43426	-1	-1	-1
16	bawół	buffalo	131	5	4.98	1.15157	3.36	2.00774	2.96	2.29427	4.8752	0	-1	-1
17	drut	wire	646	4	4.68	0.935469	3.6	2.19461	2.5	1.71726	6.4708	0	-1	-1
18	furażerka	forage cap	7	9	4.74194	1.23741	3.42857	1.89869	2.78788	2.02728	1.94591	0	-1	-1
19	gamma	gamma	232	5	5.12	1.023	3.06122	1.81898	3.3	2.38405	5.44674	0	-1	-1
20	kołowanie	taxiing	18	9	4.8	1.10657	3.44	1.97081	2.88	1.92343	2.89037	0	-1	-1
21	kwarta	quart	14	6	5.42	0.758355	3.08163	1.86901	3	1.80278	2.63906	0	-1	-1
22	oprawianie	binding	9	10	5.14	1.21235	3.66	1.90177	3.02	2.0453	2.19722	0	-1	-1
23	pauza	pause	552	5	5.04	0.781417	3.08	2.05873	3.12	2.0863	6.31355	0	-1	-1
24	seria	series	1180	5	5.28	0.640153	3.26	1.98782	2.84	1.8556	7.07327	0	-1	-1
25	sfera	sphere	286	5	5.34	0.917183	3.54	2.07227	3.3	2.14999	5.65599	0	-1	-1
26	skala	scale	236	5	5.3	0.994885	2.94	1.65874	3.04	1.87312	5.46383	0	-1	-1
27	strofa	strophe	56	6	5.12	0.798979	3.22	1.85483	2.66	1.36442	4.02535	0	-1	-1
28	tablica	blackboard	606	7	5.1	0.839096	3.46	2.03249	3.18	2.20102	6.40688	0	-1	-1
29	trans	trance	447	5	4.96	1.5513	3.62	2.34643	3.22	2.15037	6.10256	0	-1	-1
30	żebro	rib	259	5	4.84	0.976458	3.26	2.18352	3.24	1.98525	5.55683	0	-1	-1
31	arka	ark	138	4	5.74	1.2586	3.08	2.13656	3.32	2.1987	4.92725	1	-1	-1
32	atletyka	athletics	11	8	5.88	1.06215	3.58	1.91759	2.62	1.70102	2.3979	1	-1	-1
33	bryza	breeze	353	5	6.32	1.30055	3.56	2.2782	3.26	2.46452	5.86647	1	-1	-1
34	brzoskwinia	peach	25	11	6.48	1.29741	3.06	1.69525	2.62	1.60217	3.21888	1	-1	-1
35	dziedziniec	courtyard	2625	11	5.54	0.930438	3.26	1.80487	3.08	2.14609	7.87284	1	-1	-1
36	fauna	fauna	121	5	6.22	1.25014	2.98	2.02525	2.92	1.82768	4.79579	1	-1	-1
37	gospodarstwo	farm	759	12	5.68	0.890769	3.16	1.87747	3.28	1.94873	6.632	1	-1	-1
38	luzak	easygoing	14	5	5.78	1.38932	3.48	2.11158	3.16	1.83348	2.63906	1	-1	-1
39	łąka	meadow	340	4	6.98	1.28556	2.76	1.93317	3.32	2.1987	5.82895	1	-1	-1
40	plusk	splash	613	5	5.63265	1.21953	3.42	2.20473	2.66	1.68559	6.41836	1	-1	-1
41	połysk	shine	407	6	5.8	1.08797	3.28	1.90638	3.2	2.09956	6.00881	1	-1	-1
42	powiew	whiff	1391	6	6.1	1.32865	3.5	2.36686	3.18	2.14467	7.23778	1	-1	-1
43	sezon	season	565	5	5.86	1.14304	3.18	1.89187	3.32	2.01464	6.33683	1	-1	-1
44	sfinks	sphinx	176	6	5.62	1.0859	3	2.02031	2.42	1.7623	5.17048	1	-1	-1
45	truskawka	strawberry	62	9	6.98	1.43555	3.38	2.06911	3.1	1.97174	4.12713	1	-1	-1
46	czkawka	hiccup	79	7	4.04	1.24474	3.86	2.17603	2.86	1.77293	4.36945	-1	0	-1
47	dym	smoke	4581	3	4.38	1.30759	3.96	2.4156	3.12	1.86963	8.42967	-1	0	-1
48	dziura	hole	1264	6	4.18	1.024	4.2	2.27677	3.14	1.90606	7.14204	-1	0	-1
49	mrowienie	tingle	482	9	4.26	1.13946	3.96	2.04999	3.24	2.13389	6.17794	-1	0	-1
50	niedoborem	deficient	14	10	3.5	0.952976	3.88	1.92343	3.14	1.92735	2.63906	-1	0	-1
51	ochłap	to sop	118	6	3.28	1.24605	3.79592	1.82551	2.97959	2.01546	4.77068	-1	0	-1
52	plama	stain	1355	5	3.92	0.899887	3.85714	1.88193	3.18	2.20102	7.21156	-1	0	-1
53	podwiązka	garter	8	9	4.58	1.37158	4.08	1.91493	2.98	1.78988	2.07944	-1	0	-1
54	pomiot	offspring	122	6	3.65957	1.27308	4.08163	2.29888	3.22917	2.25256	4.80402	-1	0	-1
55	psiarnia	kennel	12	8	4.04	1.7608	3.83673	2.19229	2.88	1.90209	2.48491	-1	0	-1
56	recesja	recession	25	7	3.625	1.31481	4.20408	2.16967	3.2	1.6413	3.21888	-1	0	-1
57	sabat	Sabbath	913	5	4.56	1.61826	4.10417	2.42539	2.71429	2.05142	6.81674	-1	0	-1
58	sikanie	piss	13	7	4.28	1.67868	4.16	2.21645	3.24	2.046	2.56495	-1	0	-1
59	szczur	rat	1054	6	3.46	1.4598	4.08	2.11737	2.36	1.72331	6.96035	-1	0	-1
60	tandeta	trash	80	7	3.02	1.03982	4.08	2.13656	3.2	2.1571	4.38203	-1	0	-1
61	agencja	agency	461	7	4.94	0.739829	4.04	2.42403	3.26	2.35441	6.1334	0	0	-1
62	akt	act	2997	3	5.3	1.43214	3.9	2.21544	3.26	2.07817	8.00537	0	0	-1
63	baron	baron	2683	5	5.4	1.01015	3.92	2.11737	2.48	1.75243	7.89469	0	0	-1
64	brąz	bronze	347	4	5.04	1.35466	3.82	2.21949	2.48	1.66892	5.84932	0	0	-1
65	buzdygan	scepter	19	8	5.08333	1.47196	4.06452	2.44861	3.09091	2.19892	2.94444	0	0	-1
66	cesarz	emperor	3396	6	5.44	1.1808	4.18	2.14467	3.04	1.82902	8.13035	0	0	-1
67	gromada	troop	1175	7	5.4	1.08797	3.9	2.25198	2.78	1.70581	7.06902	0	0	-1
68	ochra	ocher	24	5	5.10714	0.737327	3.8125	2.46835	2.91176	2.09426	3.17805	0	0	-1
69	oddział	branch	4586	7	4.84	0.955329	3.86	2.18539	3.02	1.5451	8.43076	0	0	-1
70	olbrzym	giant	1495	7	4.98	0.979171	4.04	2.0698	2.7	1.80984	7.30988	0	0	-1
71	plemię	tribe	1018	6	5.32	0.998775	3.92	2.15558	3.14	2.0001	6.9256	0	0	-1
72	podbródek	chin	1467	9	5.02	1.11557	3.86	2.03048	3.2	2.05039	7.29097	0	0	-1
73	szlachta	nobility	811	8	5.46	1.21571	4.08	2.30208	2.78	1.69381	6.69827	0	0	-1
74	totem	totem	146	5	5.3913	1.20145	4.02041	2.1359	2.16667	1.56196	4.98361	0	0	-1
75	zmierzch	twilight	1516	8	5.26	0.803309	3.73469	1.9555	3.28	1.76172	7.32383	0	0	-1
76	biżuteria	jewelry	167	9	6.48	1.19932	4.04	2.43243	3.34	1.9337	5.11799	1	0	-1
77	giętkość	flexible	68	8	5.6	1.03016	3.98	2.14276	2.9	1.52864	4.21951	1	0	-1
78	koszykówka	basketball	14	10	5.74	1.42585	4.16	2.35918	2.96	2.0698	2.63906	1	0	-1
79	loteria	lottery	56	7	5.76	1.49229	4.1	2.32335	3.12	1.92343	4.02535	1	0	-1
80	nurkowanie	diving	84	10	5.66	1.40857	3.98	2.15227	3.24	2.07571	4.43082	1	0	-1
81	pierścień	ring	2834	9	6.04	1.26103	3.78	2.02323	2.48	1.63183	7.94944	1	0	-1
82	pies	dog	8118	4	6.74	1.84954	3.84	2.27999	3.2	2.19461	9.00184	1	0	-1
83	pizza	pizza	129	5	7.12	1.67381	4.02	2.07502	3.22	2.2972	4.85981	1	0	-1
84	promień	ray	1907	7	5.94	1.18511	3.82	2.17303	3.2	1.74964	7.55329	1	0	-1
85	ranczo	ranch	271	6	5.78	1.28238	3.74	2.11708	2.96	1.97907	5.60212	1	0	-1
86	szyk	chic	633	4	5.58	1.2304	3.78	2.02323	3.24	2.046	6.45047	1	0	-1
87	willa	villa	1099	5	6.42	1.27919	4.24	2.30846	3.36	1.99755	7.00216	1	0	-1
88	wiosłowanie	rowing	54	11	5.66	1.00224	3.84	2.14152	2.48	1.6932	3.98898	1	0	-1
89	wróżka	fairy	338	6	5.6	1.85164	4.18	2.37925	2.92	2.31975	5.82305	1	0	-1
90	zioło	herb	35	5	5.8	1.2454	4.22	2.26139	2.56	1.48681	3.55535	1	0	-1
91	czołg	tank	662	5	4.3	1.7291	4.3	2.50102	3.26	2.08796	6.49527	-1	1	-1
92	farsa	farce	144	5	3.97959	1.52055	4.54	2.14961	3.30612	2.02283	4.96981	-1	1	-1
93	hazard	gamble	292	6	3.96	1.77235	5.3	2.33212	3.16	1.98319	5.67675	-1	1	-1
94	jazgot	clamor	229	6	3.44	1.12776	5.20408	2.49148	2.76	1.99551	5.43372	-1	1	-1
95	krawędź	edge	1989	7	4.38	1.04764	4.28	2.50746	3.02	1.69621	7.59539	-1	1	-1
96	krucjata	crusade	137	8	3.61224	1.22162	5.28	2.74077	3.26	2.22976	4.91998	-1	1	-1
97	lizus	toady	39	5	3.02	1.15157	5.02	2.32546	2.98	2.33422	3.66356	-1	1	-1
98	moszna	scrotum	15	6	4.42	1.32619	4.38	2.31137	2.96	2.07964	2.70805	-1	1	-1
99	nudności	nausea	244	8	2.7	1.18235	4.38	2.39804	3.16	1.86657	5.49717	-1	1	-1
100	obława	round-up	97	6	4	1.35526	4.86	2.49088	2.94	1.77752	4.57471	-1	1	-1
101	owad	insect	365	4	4.36	1.67527	4.34	2.02646	2.46	1.41724	5.8999	-1	1	-1
102	paszkwil	pamphlet	69	8	3.56818	1.54615	4.5122	2.48115	2.77273	1.73693	4.23411	-1	1	-1
103	rewolwer	revolver	2145	8	4.32	1.77787	5.38	2.45689	3.32	1.64677	7.67089	-1	1	-1
104	skarżypyta	talebearer	17	10	3.28	1.34073	4.92	2.08826	3.14	1.87366	2.83321	-1	1	-1
105	wampir	vampire	701	6	4.52	1.95082	4.9	2.45988	3	2.26779	6.55251	-1	1	-1
106	bokser	boxer	253	6	4.8	1.08797	4.62	2.24872	2.64	1.96666	5.53339	0	1	-1
107	car	tsar	1073	3	4.81633	1.43865	4.56	2.29605	2.36	1.71143	6.97821	0	1	-1
108	cycek	tit	35	5	5.5	1.77569	5.4	2.24063	3.34	2.00621	3.55535	0	1	-1
109	doping	doping	23	6	5.24	1.93317	5.18	2.2469	3.3	2.44323	3.13549	0	1	-1
110	dubeltówka	shotgun	50	10	4.8	1.37024	4.74	2.59363	2.8	1.72615	3.91202	0	1	-1
111	dżudo	judo	71	5	5.24	1.04119	4.3	2.2429	2.42	1.45812	4.26268	0	1	-1
112	gala	gala	131	4	5.7	1.05463	4.06	2.19842	3.36	1.95626	4.8752	0	1	-1
113	harem	harem	111	5	5.14286	1.5411	4.74	2.14581	2.86	1.94842	4.70953	0	1	-1
114	kryminał	thriller / jail	111	8	4.88	1.94454	5.06	2.17039	3.28	1.6418	4.70953	0	1	-1
115	łowiectwo	hunting	7	9	4.88	1.45181	4.28	2.25008	3.24	2.30846	1.94591	0	1	-1
116	marszałek	marshal	1315	9	5.1	1.09265	4.32	2.35987	3.2	1.80702	7.18159	0	1	-1
117	niedźwiedzie	bears	798	12	5.42	1.34149	4.38	2.05923	3.02	2.24509	6.68211	0	1	-1
118	psota	mischief	22	5	5.08	1.32234	4.4	2.03038	3.26	2.1553	3.09104	0	1	-1
119	ruiny	ruins	1958	5	4.84	1.8556	4.62	2.19359	3.2	1.84059	7.57968	0	1	-1
120	tyłek	ass	1075	5	5.38	1.73664	4.58	2.16738	3.18	2.20102	6.98008	0	1	-1
121	dyskoteka	disco	32	9	6.04	1.7608	4.8	2.4661	3.14	1.89532	3.46574	1	1	-1
122	fajerwerk	firework	83	9	6.4	1.35526	5.38	2.38952	3.22	1.94086	4.41884	1	1	-1
123	galop	gallop	252	5	5.76	1.17038	4.56	2.67383	2.54	1.4875	5.52943	1	1	-1
124	komik	comic	56	5	6.16	1.48956	4.44	2.20537	2.5	1.40335	4.02535	1	1	-1
125	lew	lion	1747	3	5.9	1.28174	4.46	2.42613	2.96	1.7608	7.46566	1	1	-1
126	salsa	salsa	8	5	6.46	1.23239	4.62	2.47345	3.3	2.14999	2.07944	1	1	-1
127	salwa	salvo	332	5	5.5625	1.1281	4.7	2.74977	2.74	1.80487	5.80513	1	1	-1
128	skok	jump	1307	4	5.5	1.24949	4.38	2.31137	3.3	2.14047	7.17549	1	1	-1
129	smok	dragon	3438	4	5.66	1.62393	4.58	2.3043	2.8	1.98977	8.14265	1	1	-1
130	sprint	sprint	38	6	5.68	1.23619	4.54	2.53313	3.28	2.15747	3.63759	1	1	-1
131	tancerz	dancer	188	7	6.3	1.32865	4.8	2.3819	3.22	2.26139	5.23644	1	1	-1
132	tango	tango	197	5	6.12	1.33463	4.52	2.39251	3.02	2.07502	5.2832	1	1	-1
133	toast	toast	689	5	6.36	1.20814	4.3	2.12132	3.34	1.92311	6.53524	1	1	-1
134	tropiki	tropics	21	7	6.26	1.71202	4.62	2.61776	3.18	1.94506	3.04452	1	1	-1
135	żartowniś	joker	77	9	6.16	1.36067	4.66	2.22793	3.26	2.00825	4.34381	1	1	-1
136	laik	layman	52	4	4.42857	0.978945	3.2449	2.01588	3.5	2.2429	3.95124	-1	-1	0
137	marazm	marasmus	43	6	3.5	1.22474	3.45652	2.41943	3.625	2.14004	3.7612	-1	-1	0
138	margines	margin	265	8	4.46	0.952119	3.1	2.02283	3.5	2.27004	5.57973	-1	-1	0
139	maska	gas mask	996	5	4.66	1.30321	3.64	2.18305	3.5	2.18763	6.90375	-1	-1	0
140	minus	minus	554	5	3.84	1.0947	3.52	2.22454	3.56	2.21461	6.31716	-1	-1	0
141	opieszałość	tardiness	90	11	3.42	1.07076	3.59184	2.12052	3.76	2.23662	4.49981	-1	-1	0
142	parada	parade	190	6	4.56	1.38741	3.62	2.20287	3.6	2.24063	5.24702	-1	-1	0
143	plewy	chaff	103	5	4.40909	1.20692	3.3125	1.47542	3.5	2.50111	4.63473	-1	-1	0
144	rutyna	routine	130	6	3.56	1.23156	2.52	1.61927	3.74	2.29294	4.86753	-1	-1	0
145	słabeusz	weakling	32	8	3.18	1.13731	3.58	2.04131	3.48	2.10189	3.46574	-1	-1	0
146	sutanna	counter	60	7	4.5	1.46036	3.14	2.03048	3.72	2.33902	4.09434	-1	-1	0
147	urzędnik	clerk	1877	8	4.02	1.43555	3.62	2.01919	3.5	2.45157	7.53743	-1	-1	0
148	ustawa	deed	186	6	4.54	1.05386	3.68	2.13274	3.56	1.94999	5.22575	-1	-1	0
149	wilgoć	moisture	1098	6	3.94	1.07684	3.62	1.98864	3.58	2.15795	7.00125	-1	-1	0
150	złudzenie	delusion	1359	9	4.22	1.31382	3.56	2.04201	3.56	2.20537	7.2145	-1	-1	0
151	aspekt	aspect	555	6	5.3	0.762648	2.84	1.68256	3.48	2.14038	6.31897	0	-1	0
152	dogmat	dogma	81	6	4.95833	1.09074	3.57447	2.16438	3.56	2.47568	4.39445	0	-1	0
153	etykieta	label	126	8	4.9	0.952976	3.52	1.80972	3.9	2.28795	4.83628	0	-1	0
154	ikona	icon	78	5	5.46	1.01439	3.06	1.98371	3.44	1.98114	4.35671	0	-1	0
155	kilogram	kilo	122	8	4.74	1.24228	3.52	2.02273	3.39583	2.22882	4.80402	0	-1	0
156	kwartał	quarter	184	7	5.12	0.718275	3.14	2.11901	3.46	2.05247	5.21494	0	-1	0
157	model	model	1609	5	5.44	1.03332	3.6	1.92725	3.54	2.34921	7.38337	0	-1	0
158	pompowanie	pumping	29	10	4.98	1.11557	3.62	1.92608	3.54	2.3405	3.3673	0	-1	0
159	poziom	level	3221	6	5.14	0.926041	3.2	2.24063	3.82	1.826	8.07745	0	-1	0
160	rodzaj	kind	5384	6	5.3	0.952976	3.34	1.98577	3.54	2.01231	8.59119	0	-1	0
161	solo	solo	1655	4	5.16	0.976458	3.46	2.14009	3.4	2.22234	7.41156	0	-1	0
162	status	status	864	6	5.14	0.969115	3.24	1.9437	3.8	1.97949	6.76157	0	-1	0
163	tendencja	trend	157	9	5.12	0.91785	3.57143	1.94722	3.6	2.06032	5.05625	0	-1	0
164	wątek	wire	808	5	5.2	0.832993	3.12	1.7337	3.78	2.02323	6.69456	0	-1	0
165	zmuszanie	forcing	51	9	5.06	1.07684	3.48	1.77557	3.6	2.19461	3.93183	0	-1	0
166	aura	aura	526	4	5.9	1.0351	3.22	2.24327	3.74	2.04849	6.2653	1	-1	0
167	flora	flora	412	5	6.38	1.2436	3.12	2.14419	3.42	2.6961	6.02102	1	-1	0
168	jesień	autumn	1266	6	5.54	1.4875	2.76	1.61068	3.48	2.03279	7.14362	1	-1	0
169	kolor	color	3616	5	6.04	1.41364	3.4	1.98977	3.7	2.57341	8.19312	1	-1	0
170	legenda	legend	1066	7	6.02	1.37752	3.2	1.94831	3.6	1.85164	6.97167	1	-1	0
171	malarstwo	genre	321	9	6.12	1.34983	3.58	2.4751	3.5	1.83225	5.77144	1	-1	0
172	melodyjka	tune	23	9	6	1.38505	3.58	2.25958	3.42	2.04131	3.13549	1	-1	0
173	mrugnięcie	wink	92	10	5.78	1.0554	3.46	2.20584	3.6	2.34738	4.52179	1	-1	0
174	muza	muse	125	4	6.38	1.22708	3.68	2.2537	3.76	2.01586	4.82831	1	-1	0
175	oaza	oasis	157	4	6.74	1.13946	2.76	2.07571	3.68	2.3685	5.05625	1	-1	0
176	pieszczoch	pet	30	10	6.88	1.45181	3	2.06032	3.76	2.16239	3.4012	1	-1	0
177	południe	south	9135	8	6.04	1.12413	3.58	2.13895	3.48	2.1688	9.11987	1	-1	0
178	przyroda	nature	502	8	7	1.26168	3.06	1.9526	3.72	2.04081	6.2186	1	-1	0
179	rzemiosło	craft	336	9	5.6	1.17803	3.36	1.83792	3.58	1.83047	5.81711	1	-1	0
180	zachód	west	7017	6	6.2	1.38505	3.6	2.0702	3.5	2.14999	8.85609	1	-1	0
181	afront	affront	95	6	3.65854	1.21675	4.08889	2.45711	3.66667	2.05603	4.55388	-1	0	0
182	breja	slush	43	5	3.4898	1.12031	4.10204	2.23835	3.38	2.57056	3.7612	-1	0	0
183	jałmużna	alms	44	8	4.36	1.36666	4.04	2.12814	3.84	2.27999	3.78419	-1	0	0
184	konformista	conformist	7	11	4.31915	1.23546	3.75	2.12883	3.84	2.41052	1.94591	-1	0	0
185	maminsynek	sissy	43	10	3.1	1.43214	4.12	2.22821	3.62	2.09849	3.7612	-1	0	0
186	naiwniak	sucker	23	8	3.38	1.02798	3.84	1.81108	3.74	2.18352	3.13549	-1	0	0
187	nicpoń	failure	100	6	4.54	1.01439	3.76	2.046	3.9	2.22463	4.60517	-1	0	0
188	nonsens	nonsense	930	7	4.04	1.00934	4.08	2.02877	3.48	2.03279	6.83518	-1	0	0
189	pacjent	patient	1164	7	4.26	1.22574	4.1	2.23379	3.58	2.0907	7.05962	-1	0	0
190	pretekst	pretext	786	8	4.6	1.30931	4.04	2.07964	3.68	1.77787	6.66696	-1	0	0
191	prymitywność	primitiveness	5	12	3.28	1.22957	4.06	2.20769	3.48	2.09216	1.60944	-1	0	0
192	sąd	court	3046	3	4.4	1.39971	4.12	2.21903	3.62	1.99888	8.02158	-1	0	0
193	szpieg	spy	637	6	3.92	1.2752	4.2	2.47436	3.62	1.99888	6.45677	-1	0	0
194	śmieci	garbage	2570	6	3.2	1.19523	3.97959	2.39348	3.44	2.2238	7.85166	-1	0	0
195	ulewa	downpour	495	5	4.18	1.45251	4	2.17594	3.46	2.08209	6.20456	-1	0	0
196	depozyt	to deposit	137	7	4.74	0.985818	3.86	2.01028	3.7	2.35822	4.91998	0	0	0
197	guru	guru	199	4	4.94	1.3311	4	2.24972	3.4	2.08003	5.2933	0	0	0
198	karma	karma	61	5	5.16	1.11319	3.9	2.41804	3.5	2.48465	4.11087	0	0	0
199	moda	fashion	612	4	5.4	1.51186	4.16	2.12238	3.78	2.26139	6.41673	0	0	0
200	obóz	camp	3147	4	5	1.53862	4.02	2.19916	3.64	1.88181	8.0542	0	0	0
201	odpływ	ebb	325	6	5.02	1.15157	3.86	2.03048	3.74	2.52182	5.78383	0	0	0
202	pakowanie	packaging	131	9	5.38	1.30759	3.92	2.23917	3.5	1.91929	4.8752	0	0	0
203	rozpiętość	spread	77	10	5.32	0.867556	3.82	1.74602	3.48	1.78703	4.34381	0	0	0
204	silnik	engine	3666	6	5.46	1.0919	4.06	2.69095	3.4	1.86263	8.20686	0	0	0
205	skinienie	nod	429	9	5.36	1.13856	3.9	1.8979	3.54	2.33177	6.06146	0	0	0
206	spadek	fall	860	6	4.8	1.48461	3.96	2.23113	3.86	2.21323	6.75693	0	0	0
207	sygnał	signal	4481	6	5.38	1.06694	3.86	2.34747	3.86	1.81839	8.4076	0	0	0
208	tembr	timbre	41	5	5.45946	0.988675	4.05263	2.49266	3.46667	2.27236	3.71357	0	0	0
209	transgresja	transgression	3	11	5.06452	1.09348	4.08108	2.19062	3.60526	2.03403	1.09861	0	0	0
210	zadatki	smack	94	7	5.32	1.18563	3.8	1.97949	3.68	1.9737	4.54329	0	0	0
211	bar	bar	1339	3	5.8	1.12486	3.8	2.20389	3.76	2.20907	7.19968	1	0	0
212	bas	bass	446	3	5.66	1.09935	4.24	2.21829	3.48	2.7048	6.10032	1	0	0
213	chrzest	baptism	309	7	5.72	1.7384	3.74	2.26608	3.78	2.3499	5.73334	1	0	0
214	forsa	moolah	405	5	5.84	1.53011	4.2	2.10926	3.68	1.95292	6.00389	1	0	0
215	gotowanie	cooking	177	9	6.64	1.20814	4.18	2.02726	3.62	2.11785	5.17615	1	0	0
216	jazda	ride	2101	5	5.82	1.13731	4.2	2.20389	3.62	1.98864	7.65017	1	0	0
217	kreskówka	cartoon	2	9	6.82	1.38048	3.96	2.29427	3.76	2.48719	0.693147	1	0	0
218	lot	flight	3014	3	6.2	1.57791	4.22	2.30607	3.68	2.07453	8.01102	1	0	0
219	nazwa	name	2904	5	5.84	0.955329	3.8	2.18529	3.66	2.08601	7.97384	1	0	0
220	parkiet	dancefloor	263	7	5.78	1.26636	3.74	2.11708	3.56	2.13006	5.57215	1	0	0
221	pokaz	show	1035	5	5.74	1.10306	3.88	1.88051	3.7	2.39259	6.94216	1	0	0
222	przód	front	2093	5	5.54	0.973317	3.8	2.20389	3.66	1.98577	7.64635	1	0	0
223	restauracja	restaurant	520	11	6.26	1.15723	3.84	2.16992	3.62	2.07895	6.25383	1	0	0
224	słodycz	sweetness	477	7	7.02	1.39225	4.14	2.42445	3.62	2.23962	6.16752	1	0	0
225	sztuczka	trick	767	8	5.94	1.09563	4.2	2.19461	3.48	2.25189	6.64249	1	0	0
226	absurd	absurd	623	6	4.22	1.34453	4.88	2.20981	3.4	1.67819	6.43455	-1	1	0
227	armata	cannon	126	6	4.64	1.4535	4.34	2.52829	3.38	2.13704	4.83628	-1	1	0
228	ciśnienie	pressure	1146	9	4.58	0.970798	4.48	2.27892	3.6	2.21313	7.04403	-1	1	0
229	czarownica	witch	1712	10	4.48	1.84324	4.76	2.33483	3.56	2.51656	7.44542	-1	1	0
230	grzywna	fine	41	7	3.1	1.07381	5.16327	2.41822	3.76	2.36091	3.71357	-1	1	0
231	jarzmo	yoke	213	6	4.04167	1.12908	4.3125	2.34436	3.71429	2.02073	5.36129	-1	1	0
232	klaps	slap	35	5	4.08	1.17526	4.62	2.20287	3.72	2.09995	3.55535	-1	1	0
233	nieuctwo	ignorance	21	8	2.95918	1.04002	4.58333	2.314	3.64	2.28357	3.04452	-1	1	0
234	pchnięcie	push	453	9	4.28	1.19591	4.56	2.20537	3.54	1.92947	6.11589	-1	1	0
235	perwersja	perversion	59	9	4.26	1.42585	5.4	2.54751	3.8	2.16654	4.07754	-1	1	0
236	pięść	fist	1929	5	4.42	1.41551	4.76	2.29071	3.54	2.21507	7.56476	-1	1	0
237	szafot	scaffold	177	6	3.52778	1.424	4.60976	2.55811	3.40909	2.10556	5.17615	-1	1	0
238	szarpnięcie	jerk	530	11	4.04	1.08722	4.62	1.91546	3.74	2.09771	6.27288	-1	1	0
239	test	test	768	4	4.46	0.994064	4.68	2.3074	3.78	2.19731	6.64379	-1	1	0
240	urwisko	cliff	380	7	4.4	1.37024	4.74	2.50559	3.72	2.46643	5.94017	-1	1	0
241	dzikość	wildness	180	7	4.78	1.4886	5.66	2.66198	3.74	2.00825	5.19296	0	1	0
242	fetysz	fetish	39	6	4.9	1.47427	4.98	2.26319	3.42	2.06121	3.66356	0	1	0
243	gigant	giant	155	6	5.18	1.25666	4.62	2.19359	3.68	2.1894	5.04343	0	1	0
244	labirynt	maze	1031	8	5.16	0.976458	4.52	2.33203	3.68	2.34251	6.93828	0	1	0
245	lesbijka	lesbian	26	8	4.76	1.70904	5.06	2.11322	3.88	2.45482	3.2581	0	1	0
246	myśliwiec	fighter	312	9	4.92	1.00691	4.32	2.45315	3.72	2.38225	5.743	0	1	0
247	orgia	orgy	108	5	4.9	1.91929	5.82	2.28294	3.48	2.17818	4.68213	0	1	0
248	penis	penis	191	5	5.36	1.43939	5.06	2.17039	3.52	2.11158	5.25227	0	1	0
249	piorun	lightning	1225	6	4.98	1.75534	5.06	2.78047	3.46	1.68074	7.1107	0	1	0
250	przemówienie	speech	987	12	5.16	1.13137	4.72	2.13847	3.66	1.94422	6.89467	0	1	0
251	szarża	rank	141	6	5.27083	1.21585	4.71429	2.62202	3.36735	2.26103	4.94876	0	1	0
252	unik	to dodge	461	4	4.96	1.35466	4.42	2.15795	3.66	2.0762	6.1334	0	1	0
253	wilk	wolf	2730	4	5.14	1.70246	4.66	2.13436	3.48	2.57333	7.91206	0	1	0
254	wrzenie	boiling	131	7	5.1	1.32865	5.1	2.64382	3.4	1.65369	4.8752	0	1	0
255	zryw	spurt	95	4	5.12	1.25584	4.48	2.53337	3.72	1.92767	4.55388	0	1	0
256	bieg	run	2554	4	5.8	1.01015	4.3	2.22463	3.56	1.89694	7.84542	1	1	0
257	dowcip	wit	1345	6	6.78	1.35962	5.06	1.98371	3.82	2.12555	7.20415	1	1	0
258	fart	to fluke	138	4	6.74	1.3674	4.34	2.24618	3.86	2.27686	4.92725	1	1	0
259	hulanka	party	32	7	5.68	1.16829	5.08163	2.27153	3.48	2.12122	3.46574	1	1	0
260	impreza	show / entertainment	234	7	6.96	1.30868	5.9	2.51729	3.84	2.05397	5.45532	1	1	0
261	komedia	comedy	452	7	6.88	1.25584	4.7	2.36686	3.9	1.82108	6.11368	1	1	0
262	oklaski	applause	687	7	6.8	1.19523	5.08	2.2932	3.78	2.02323	6.53233	1	1	0
263	pikanteria	zest	5	10	6	1.27475	5.52	2.46808	3.84	2.15103	1.60944	1	1	0
264	podnieta	stimulant	22	8	5.69048	1.29705	4.97917	2.1387	3.85417	2.24072	3.09104	1	1	0
265	rycerz	knight	2874	6	6.32	1.25259	4.4	2.41593	3.52	2.24281	7.96346	1	1	0
266	sportowiec	athlete	88	10	6.24	1.23817	4.58	2.33946	3.52	1.97164	4.47734	1	1	0
267	tańczenie	dancing	24	9	6.6	1.59079	5.46	2.50884	3.7	2.08248	3.17805	1	1	0
268	turbo	turbo	30	5	5.76	1.37855	5.06	2.62181	3.78	2.47675	3.4012	1	1	0
269	walentynka	valentine	2	10	6.42	1.67929	4.66	2.43788	3.84	2.2439	0.693147	1	1	0
270	zabawki	toys	922	7	6.62	1.12286	4.36	2.43076	3.74	2.06832	6.82655	1	1	0
271	apatia	apathy	147	6	3.28	1.24605	3.3	2.12132	4.44898	2.18957	4.99043	-1	-1	1
272	brak	lack	11192	4	3.82	1.33539	3.28	2.3908	4.48	2.56539	9.32295	-1	-1	1
273	brutto	gross	67	6	4.68	1.09619	3.46	2.16851	4.16	2.36781	4.20469	-1	-1	1
274	koniec	end	22353	6	4.04	1.72568	3.68	2.31622	5.16	2.59009	10.0147	-1	-1	1
275	kontrolowania	controlling	166	13	4.38	1.14089	3.72	2.09995	4.26	1.82734	5.11199	-1	-1	1
276	ksiądz	priest	8188	6	4.62	1.57649	3.46	2.18725	3.94	2.4529	9.01042	-1	-1	1
277	melancholia	melancholia	260	11	4	1.3994	2.9	2.5575	4.68	2.3074	5.56068	-1	-1	1
278	nostalgia	nostalgia	118	9	4.66	1.54669	3.2	2.36471	4.58	2.49154	4.77068	-1	-1	1
279	nuda	ennui	534	4	3.1	1.26572	2.58	1.9597	4.24	2.30846	6.2804	-1	-1	1
280	obojętność	indifference	1054	10	3.98	1.5451	3.42	2.01109	5	2.34738	6.96035	-1	-1	1
281	pasywność	passivity	15	9	3.38	1.04764	3.2	1.96915	3.92	1.97784	2.70805	-1	-1	1
282	rezygnacja	resignation	292	10	3.04	1.21151	3.62	2.13704	4.52	2.21535	5.67675	-1	-1	1
283	słabowitość	valetudinarianism	2	11	3.4	1.16058	3.72	1.90638	4	2.21313	0.693147	-1	-1	1
284	termin	term	1642	6	4.66	1.04217	3.62	2.13704	4.36	2.22013	7.40367	-1	-1	1
285	zmęczenie	fatigue	2044	9	3.28	1.16128	3.5	2.25198	4.62	2.29365	7.62266	-1	-1	1
286	dystans	distance	1461	7	4.84	1.20136	3.58	2.15795	4.44	2.34007	7.28688	0	-1	1
287	dzielnica	district	485	9	5.32	0.867556	3.36	2.02797	4.22	2.39293	6.18415	0	-1	1
288	emerytura	pension	45	9	4.9	1.76416	3.42	1.89618	4.36	2.55359	3.80666	0	-1	1
289	gen	gene	1062	3	5.14	1.01035	3.3	2.10199	4.3	2.33212	6.96791	0	-1	1
290	jaźń	self	241	4	5.33333	1.20872	3.45833	1.99956	4.08	2.58599	5.4848	0	-1	1
291	kąt	angle	2562	3	4.94	1.13227	3.52	2.22454	3.98	2.91015	7.84854	0	-1	1
292	kontekst	context	89	8	5	0.903508	3.56	2.13962	4.06	1.9526	4.48864	0	-1	1
293	lekcja	lesson	575	6	4.98	0.979171	3.24	1.93317	4.7	2.00255	6.35437	0	-1	1
294	liczba	number	2721	6	5.28	0.948468	3.3	2.01271	4.22	2.4685	7.90875	0	-1	1
295	naczynia	dishes	1844	8	4.92	0.778276	3.28	1.85208	3.92	2.66374	7.51969	0	-1	1
296	nektar	nectar	102	6	5.24	0.686904	3.18	1.88105	4.02	2.43688	4.62497	0	-1	1
297	norma	norm	268	5	5.16	0.865672	3.16	2.1605	4.12	2.10577	5.59099	0	-1	1
298	standard	norm	167	8	5.32	0.978128	3.2	1.87355	4.4	2.18529	5.11799	0	-1	1
299	środki	means	3369	6	5.28	0.904411	3.36	1.92471	3.98	1.93243	8.12237	0	-1	1
300	aktualności	news	81	11	5.5	1.05463	3.76	2.1243	4.28	2.38225	4.39445	0	-1	1
301	autonomia	autonomy	19	9	5.9	1.46036	3.3	2.12132	4.9	2.51729	2.94444	1	-1	1
302	azyl	asylum	252	4	6.26	1.56244	3.18	2.03731	4.84	2.27999	5.52943	1	-1	1
303	czyn	deed	1709	4	5.66	1.27151	3.44	1.88615	5.04	2.24026	7.44366	1	-1	1
304	flaga	flag	336	5	5.72	0.969746	3.24	1.96458	4.22	2.3412	5.81711	1	-1	1
305	gwarancja	guarantee	127	9	6.28	1.14357	3.2	2.06032	4.4	2.11891	4.84419	1	-1	1
306	mapa	map	808	4	6.14	1.27791	2.92	1.91493	4.4	2.28571	6.69456	1	-1	1
307	niemowlę	infant	878	8	6.26	1.60115	3.48	2.4598	3.94	2.52667	6.77765	1	-1	1
308	opcja	option	57	5	5.6	1.10657	3.64	2.00774	4.26	1.88236	4.04305	1	-1	1
309	opieka	care	436	6	6.58	1.29505	3.36	2.14533	5.14	2.09966	6.07764	1	-1	1
310	patent	patent	221	6	5.92	1.20949	3.52	1.86526	4.26	2.30182	5.39816	1	-1	1
311	pogoda	wheather	2724	6	6.38	1.06694	3.44	1.97081	4.02	2.53538	7.90986	1	-1	1
312	takt	tact	836	4	5.98	1.11557	3.5	1.87628	4.36	2.53755	6.72863	1	-1	1
313	ukojenie	relief	334	8	6.64	1.30556	2.9	2.17828	5.06	2.02444	5.81114	1	-1	1
314	wypoczynek	rest	407	10	7.54	1.2811	2.96	2.0199	4.64	2.24754	6.00881	1	-1	1
315	złotówka	PLN	25	8	6.04	1.06828	3.2	1.95876	4.06	2.46949	3.21888	1	-1	1
316	cena	price	1390	4	4.64	1.1205	3.88	1.74543	5.14	2.25886	7.23706	-1	0	1
317	chłód	chill	3252	5	3.86	1.59092	4.18	2.20102	4.02	2.14276	8.08703	-1	0	1
318	czekanie	waiting	690	8	4	1.38505	3.8	2.36471	4.88	2.06664	6.53669	-1	0	1
319	kontrola	control	672	8	4.56	1.38741	3.92	2.24826	4.38	2.415	6.51026	-1	0	1
320	niepewność	uncertainty	1076	10	3.4	0.880631	4.06	2.32476	4.7	2.28795	6.98101	-1	0	1
321	niższość	inferiority	26	8	3.24	1.07968	4.12	2.13465	4.04	2.00977	3.2581	-1	0	1
322	oschłość	coldness	48	8	3.18	1.04374	4.06	2.09382	4.14	1.94842	3.8712	-1	0	1
323	podatek	tax	228	7	4.26	1.24228	4.18	2.2469	4	2.39046	5.42935	-1	0	1
324	reumatyzm	rheumatism	211	9	2.96	1.22824	3.72	2.14799	2.98	2.01515	5.35186	-1	0	1
325	stronnictwo	party	191	11	4.28	1.26233	4.16	2.25298	4.08	2.37194	5.25227	-1	0	1
326	śpiączka	coma	53	8	2.44	1.26427	4.02	2.50298	4.32	2.59859	3.97029	-1	0	1
327	ujma	disparagement	15	4	3.53061	1.32448	4.08163	2.52353	4.28	2.28607	2.70805	-1	0	1
328	wada	defect	211	4	3.3	1.0351	4.12	2.12507	4.46	2.00214	5.35186	-1	0	1
329	wrak	shipwreck	620	4	3.42	1.35662	4.1	2.52538	4.02	2.44524	6.42972	-1	0	1
330	wymówka	excuse	211	7	3.96	1.293	3.98	1.97422	4.06	2.2261	5.35186	-1	0	1
331	członek	member	2123	7	4.98	0.958102	3.84	2.08356	4.12245	2.30608	7.66059	0	0	1
332	narząd	organ	100	6	4.92	1.02698	3.98	2.29009	4.18	2.25597	4.60517	0	0	1
333	nasienie	seed	409	8	4.9	1.43214	4.06	2.24436	4.1	2.32335	6.01372	0	0	1
334	nawyk	habit	367	5	4.88	1.04276	3.74	2.35441	4.46	2.3837	5.90536	0	0	1
335	obmyślanie	conceiving	20	10	5.44	1.05289	3.82	2.44691	4.6	2.08982	2.99573	0	0	1
336	powinność	should	368	9	4.94	1.3311	4.12	2.22821	4.82	2.09655	5.90808	0	0	1
337	powód	reason	4984	5	5.22	0.815413	3.96	2.17556	4.72	2.49931	8.51399	0	0	1
338	singiel	single	6	7	4.88	1.42342	3.84	2.44415	4.1	2.34955	1.79176	0	0	1
339	skrucha	repentance	121	7	4.76	1.23817	4.1	2.27901	4.28	2.36505	4.79579	0	0	1
340	sumienie	conscience	1615	8	5.38	1.3536	3.86	2.24981	5.98	2.26319	7.38709	0	0	1
341	szkoła	school	1747	6	5.42	1.10823	3.88	2.09606	4.2	2.6264	7.46566	0	0	1
342	udowadnianie	proving	10	12	5.12	1.18907	3.88	1.99632	4.5	2.39259	2.30259	0	0	1
343	wpływ	influence	3586	5	5.28	1.27839	3.8	2.08982	4.46939	2.25557	8.18479	0	0	1
344	wynajem	rent	65	7	5.06	0.682433	3.88	1.88051	3.94	2.31596	4.17439	0	0	1
345	zdziwienie	astonishment	1607	10	4.92	1.02698	4.24	2.14343	4.34	1.84734	7.38212	0	0	1
346	atut	trump	358	4	6.58	1.12649	3.9	2.17828	4.8	2.28571	5.88053	1	0	1
347	autorytet	authority	775	9	6.7	1.32865	4.06	2.42782	5.36	2.43914	6.65286	1	0	1
348	duet	duo	193	4	5.76	1.07968	3.74	2.09771	3.94	2.39395	5.26269	1	0	1
349	edukacja	education	129	8	5.96	1.293	3.8	1.82946	5.02	2.63795	4.85981	1	0	1
350	ochrona	protection	618	7	5.88	1.17178	4.16327	2.38351	4.22	2.39293	6.42649	1	0	1
351	pisarz	writer	2412	6	5.74	1.30634	3.76	2.19981	3.96	2.28536	7.78821	1	0	1
352	rytm	rhythm	2412	4	6.18	1.18992	3.78	2.3412	3.98	2.4784	7.78821	1	0	1
353	suknia	gown	963	6	6.12	1.36487	3.84	2.31552	4.06	2.51047	6.87005	1	0	1
354	trener	coach	337	6	5.7	1.09265	3.94	2.17978	3.94	2.16097	5.82008	1	0	1
355	ulepszenie	improvement	30	10	6.48	0.973946	4.08	2.22087	4.44	2.62764	3.4012	1	0	1
356	zachęta	incentive	95	7	6.42	0.970798	4.18	2.21027	4.84	1.95208	4.55388	1	0	1
357	zbawca	savior	69	6	6.62	1.62744	4.02	2.28116	4.64	2.45581	4.23411	1	0	1
358	zdolność	talent	2622	8	6.6	1.06904	4.2	2.42437	4.7	2.25198	7.87169	1	0	1
359	znacznik	filling card	18	8	6.4	1.14286	4.22	2.3237	4.24	2.25479	2.89037	1	0	1
360	zręczność	dexterity	422	9	6.54	0.994064	3.82	2.14467	4.46	2.15908	6.04501	1	0	1
361	humory	whims	254	6	4.42	1.85263	4.82	2.29187	4.84	2.12238	5.53733	-1	1	1
362	kolos	colossus	221	5	4.32	1.54444	4.72	2.34773	4.04	2.3208	5.39816	-1	1	1
363	komenda	command	286	7	4.4	1.21218	4.3	2.26103	4.34	2.62336	5.65599	-1	1	1
364	litość	pity / mercy	2863	6	4.28	1.45742	4.34	1.88019	4.72	2.59544	7.95963	-1	1	1
365	łotr	villain	506	4	3.04	1.5644	5.3	2.17828	4.02	2.29898	6.22654	-1	1	1
366	okrzyki	cheers	2856	7	4.5	1.18235	4.9	2.45157	4.04	1.87312	7.95718	-1	1	1
367	protest	protest	624	7	4.10204	1.24574	4.88	2.42133	4.58	2.2686	6.43615	-1	1	1
368	przebiegłość	cunning	231	12	4.34	1.54669	4.58	2.33072	4.2	2.34738	5.44242	-1	1	1
369	skąpstwo	avarice	104	8	3.02	1.09712	4.84	2.09333	4.28	1.79614	4.64439	-1	1	1
370	spowiedź	confession	347	8	4.16	1.53011	4.46	2.51696	4.18	2.69308	5.84932	-1	1	1
371	tabu	taboo	532	4	4.48	1.44618	4.34	2.20953	4	2.19461	6.27664	-1	1	1
372	wezwanie	call	2117	8	4.14	0.880862	4.86	2.15719	4.1	2.21544	7.65776	-1	1	1
373	wyzysk	exploitation	82	6	3.04	1.293	5.26	2.41433	4.52	2.49277	4.40672	-1	1	1
374	zapalczywość	impetuosity	51	12	4.48	1.19932	4.38776	2.36129	4.04	2.34703	3.93183	-1	1	1
375	zniewaga	insult	118	8	4.36	2.09723	4.68	2.05476	4.54	2.4429	4.77068	-1	1	1
376	budżet	budget	243	6	5.32	1.11465	4.3	2.16889	4.34	2.34399	5.49306	0	1	1
377	buntownik	rebel	101	9	4.8	1.6413	5.54	2.25162	4.86	2.18539	4.61512	0	1	1
378	burza	storm	3238	5	4.86	1.76138	5.3	2.57341	4.48	2.34947	8.08271	0	1	1
379	gorliwość	diligence	206	9	5.02	1.43555	4.84	2.14152	4.1	2.01271	5.32788	0	1	1
380	ofensywa	offensive	131	8	5.3	1.55511	4.82	2.44691	4.12	2.27354	4.8752	0	1	1
381	pochwa	vagina	105	6	5.28	1.7384	4.9	2.17828	4.34	2.36134	4.65396	0	1	1
382	poryw	gust	206	5	5.04	1.33951	4.87755	2.26966	4.16	2.41052	5.32788	0	1	1
383	prezerwatywa	condom	13	12	5.16	1.64577	4.76	2.25479	4	2.39046	2.56495	0	1	1
384	rozpusta	debauchery	103	8	4.72	1.72662	5.44	2.2238	4.3	2.14999	4.63473	0	1	1
385	stawka	rate	301	6	5.42	0.970798	4.42	2.25958	4.1	2.25198	5.70711	0	1	1
386	tempo	pace	1479	5	5.22	0.995705	4.34694	2.3501	4.24	2.25479	7.29912	0	1	1
387	uwaga	note	3261	5	4.88	1.04276	4.42	2.34816	5.02	2.28116	8.08979	0	1	1
388	wojsko	army	2893	6	4.94	1.55721	4.96	2.45748	4.16	2.21645	7.97005	0	1	1
389	zachcianki	whims	230	10	4.94	1.46259	4.4	1.80702	4.72	2.32151	5.43808	0	1	1
390	zdumienie	astonishment	2044	9	5.44898	1.00127	4.64	2.28357	4.4	1.91663	7.62266	0	1	1
391	brawo	bravo	1053	5	6.68	1.11465	4.8	2.18529	4.1	1.8979	6.9594	1	1	1
392	bystrość	cuteness	161	8	6.94	1.1141	4.72	2.3127	4.8	2.35606	5.0814	1	1	1
393	chcenie	to will	17	7	5.6	1.12486	4.7	2.05287	4.96	2.24026	2.83321	1	1	1
394	dziewica	virgin	446	8	6.18	1.62493	5	2.4908	4.18	2.55303	6.10032	1	1	1
395	idol	idol	66	4	6.02	1.2534	4.52	2.39251	3.94	2.06437	4.18965	1	1	1
396	klimat	climate	824	6	6.06	1.13227	3.86	2.29471	3.9	2.34085	6.71417	1	1	1
397	lider	leader	90	5	6.22	1.21706	4.5	2.73488	4.68	2.05476	4.49981	1	1	1
398	młodzież	youth	1703	8	5.68	1.30055	4.66	2.5202	3.98	2.0946	7.44015	1	1	1
399	orgazm	orgasm	244	6	7.7	1.56818	6.94	2.42782	4.94	2.32476	5.49717	1	1	1
400	prędkość	speed	1524	8	5.58	1.05153	4.72	2.49113	4.04	1.78383	7.32909	1	1	1
401	ratunek	rescue	1458	7	6.5	1.29756	4.7	2.52538	4.96	2.3208	7.28482	1	1	1
402	rumieniec	blush	1058	9	5.68	1.31615	4.58	1.94925	3.94	2.27147	6.96414	1	1	1
403	sport	sport	363	5	6.48	1.51509	4.58	2.54823	4.1	2.56547	5.8944	1	1	1
404	urodzenie	birth	139	9	5.98	1.23701	4.53061	2.41611	4.42	2.61932	4.93447	1	1	1
405	zwinność	agility	80	8	6.44	1.24802	4.46	2.14961	4.32	1.94244	4.38203	1	1	1

## Sheet: sheet 2 (ANOVA)
	Valence	Arousal	Significance	Number of letters	Frequency
Valence, main effect for groups of words	F(2, 378) = 892.62, p < 0.01, η2 = 0.83	F(2, 378) = 0.68, p = 0.51, η2 < 0.01	F(2, 378) = 2.28, p = 0.10, η2 = 0.01	F(2, 378) = 1.07, p = 0.34, η2 < 0.01	F(2, 378) = 0.65, p = 0.52, η2 < 0.01
Arousal, main effect for groups of words	F(2, 378) = 1.62, p = 0.20, η2 < 0.01	F(2, 378) = 767.77, p < 0.01, η2 = 0.80	F(2, 378) = 0.12, p = 0.89, η2 < 0.01	F(2, 378) = 0.06, p = 0.94, η2 < 0.01	F(2, 378) = 0.68, p = 0.51, η2 < 0.01
Significance, main effect for groups of words	F(2, 378) = 0.72, p = 0.49, η2 < 0.01	F(2, 378) = 1.65, p = 0.19, η2 < 0.01	F(2, 378) = 747.32, p < 0.01, η2 = 0.80	F(2, 378) = 2.60, p = 0.08, η2 = 0.01	F(2, 378) = 2.88, p = 0.06, η2 = 0.02
Valence and arousal interaction	F(4, 378) = 1.89, p = 0.11, η2 = 0.02	F(4, 378) = 1.07, p = 0.37, η2 = 0.01	F(4, 378) = 0.35, p = 0.85, η2 < 0.01	F(4, 378) = 0.16, p = 0.96, η2 < 0.01	F(4, 378) = 1.19, p = 0.32, η2 = 0.01
Valence and significance interaction	F(4, 378) = 2.21, p = 0.07, η2 = 0.02	F(4, 378) = 0.64, p = 0.63, η2 < 0.01	F(4, 378) = 0.34, p = 0.85, η2 < 0.01	F(4, 378) = 0.47, p = 0.76, η2 < 0.01	F(4, 378) = 0.26, p = 0.90, η2 < 0.01
Arousal and significance interaction	F(4, 378) = 0.86, p = 0.49, η2 < 0.01	F(4, 378) = 0.81, p = 0.52, η2 < 0.01	F(4, 378) = 0.57, p = 0.68, η2 < 0.01	F(4, 378) = 0.32, p = 0.86, η2 < 0.01	F(4, 378) = 0.98, p = 0.42, η2 = 0.01
Valence, arousal and significance interaction	F(8, 378) = 1.26, p = 0.26, η2 = 0.03	F(8, 378) = 0.60, p = 0.78, η2 = 0.01	F(8, 378) = 1.42, p = 0.19, η2 = 0.03	F(8, 378) = 0.90, p = 0.52, η2 = 0.02	F(8, 378) = 0.93, p = 0.49, η2 = 0.02

## Sheet: sheet 3 (ANOVA - valence groups)
Valence - Low	Valence	Arousal	Significance	Number of letters	Frequency
Arousal, main effect for groups of words	F(2, 126) = 2.73, p = 0.07, η2 = 0.04	F(2, 126) = 266.67, p < 0.01, η2 = 0.81	F(2, 126) = 0.18, p = 0.83, η2 < 0.01	F(2, 126) < 0.01, p = 0.99, η2 < 0.01	F(2, 126) = 0.69, p = 0.51, η2 = 0.01
Significance, main effect for groups of words	F(2, 126) = 1.24, p = 0.29, η2 = 0.02	F(2, 126) = 0.05, p = 0.95, η2 < 0.01	F(2, 126) = 254.63, p < 0.01, η2 = 0.80	F(2, 126) = 1.74, p = 0.18, η2 = 0.03	F(2, 126) = 1.74, p = 0.18, η2 = 0.03
Arousal and significance interaction	F(4, 126) = 1.52, p = 0.20, η2 = 0.05	F(4, 126) = 0.17, p = 0.95, η2 < 0.01	F(4, 126) = 0.99, p = 0.42, η2 = 0.03	F(4, 126) = 0.65, p = 0.63, η2 = 0.02	F(4, 126) = 0.05, p = 0.99, η2 < 0.01
Valence - Medium	Valence	Arousal	Significance	Number of letters	Frequency
Arousal, main effect for groups of words	F(2, 126) = 1.04, p = 0.36, η2 = 0.02	F(2, 126) = 306.89, p < 0.01, η2 = 0.83	F(2, 126) = 0.63, p = 0.53, η2 < 0.01	F(2, 126) = 0.37, p = 0.70, η2 < 0.01	F(2, 126) = 0.86, p = 0.43, η2 = 0.01
Significance, main effect for groups of words	F(2, 126) = 0.15, p = 0.86, η2 < 0.01	F(2, 126) = 1.53, p = 0.22, η2 = 0.02	F(2, 126) = 256.59, p < 0.01, η2 = 0.80	F(2, 126) = 1.79, p = 0.17, η2 = 0.03	F(2, 126) = 0.66, p = 0.52, η2 = 0.01
Arousal and significance interaction	F(4, 126) = 1.20, p = 0.31, η2 = 0.04	F(4, 126) = 1.15, p = 0.34, η2 = 0.04	F(4, 126) = 1.55, p = 0.19, η2 = 0.05	F(4, 126) = 0.26, p = 0.91, η2 < 0.01	F(4, 126) = 2.01, p = 0.10, η2 = 0.06
Valence - High	Valence	Arousal	Significance	Number of letters	Frequency
Arousal, main effect for groups of words	F(2, 126) = 0.73, p = 0.49, η2 = 0.01	F(2, 126) = 217.60, p < 0.01, η2 = 0.78	F(2, 126) = 0.03, p = 0.97, η2 < 0.01	F(2, 126) = 0.02, p = 0.98, η2 < 0.01	F(2, 126) = 1.52, p = 0.22, η2 = 0.02
Significance, main effect for groups of words	F(2, 126) = 2.74, p = 0.07, η2 = 0.04	F(2, 126) = 1.23, p = 0.30, η2 = 0.02	F(2, 126) = 238.69, p < 0.01, η2 = 0.79	F(2, 126) = 0.06, p = 0.94, η2 < 0.01	F(2, 126) = 0.99, p = 0.38, η2 = 0.02
Arousal and significance interaction	F(4, 126) = 0.58, p = 0.68, η2 = 0.02	F(4, 126) = 0.68, p = 0.61, η2 = 0.02	F(4, 126) = 0.90, p = 0.47, η2 = 0.03	F(4, 126) = 1.19, p = 0.32, η2 = 0.03	F(4, 126) = 0.82, p = 0.51, η2 = 0.03

## Sheet: sheet 4 (ANOVA - arousal groups)
Arousal - low	Valence	Arousal	Significance	Number of letters	Frequency
Valence, main effect for groups of words	F(2, 126) = 279.33, p < 0.01, η2 = 0.82	F(2, 126) = 2.41, p = 0.09, η2 = 0.04	F(2, 126) = 2.09, p = 0.13, η2 = 0.03	F(2, 126) = 0.78, p = 0.46, η2 = 0.01	F(2, 126) = 0.11, p = 0.90, η2 < 0.01
Significance, main effect for groups of words	F(2, 126) = 0.28, p = 0.76, η2 < 0.01	F(2, 126) = 0.17, p = 0.84, η2 < 0.01	F(2, 126) = 322.96, p < 0.01, η2 = 0.84	F(2, 126) = 0.78, p = 0.46, η2 = 0.01	F(2, 126) = 2.86, p = 0.06, η2 = 0.04
Valence and significance interaction	F(4, 126) = 2.12, p = 0.08, η2 = 0.06	F(4, 126) = 0.07, p = 0.99, η2 < 0.01	F(4, 126) = 1.72, p = 0.15, η2 = 0.05	F(4, 126) = 1.04, p = 0.40, η2 = 0.03	F(4, 126) = 0.57, p = 0.69, η2 = 0.02
Arousal - medium	Valence	Arousal	Significance	Number of letters	Frequency
Valence, main effect for groups of words	F(2, 126) = 327.95, p < 0.01, η2 = 0.84	F(2, 126) = 2.83, p = 0.06, η2 = 0.04	F(2, 126) = 0.51, p = 0.61, η2 < 0.01	F(2, 126) = 0.24, p = 0.79, η2 < 0.01	F(2, 126) = 2.14, p = 0.12, η2 = 0.03
Significance, main effect for groups of words	F(2, 126) = 0.19, p = 0.83, η2 < 0.01	F(2, 126) = 0.09, p = 0.91, η2 < 0.01	F(2, 126) = 197.33, p < 0.01, η2 = 0.76	F(2, 126) = 0.57, p = 0.57, η2 < 0.01	F(2, 126) < 0.01, p = 0.99, η2 < 0.01
Valence and significance interaction	F(4, 126) = 1.73, p = 0.15, η2 = 0.05	F(4, 126) = 0.07, p = 0.99, η2 < 0.01	F(4, 126) = 1.11, p = 0.36, η2 = 0.03	F(4, 126) = 0.76, p = 0.55, η2 = 0.02	F(4, 126) = 1.18, p = 0.32, η2 = 0.04
Arousal - high	Valence	Arousal	Significance	Number of letters	Frequency
Valence, main effect for groups of words	F(2, 126) = 287.98, p < 0.01, η2 = 0.82	F(2, 126) = 0.10, p = 0.91, η2 < 0.01	F(2, 126) = 0.73, p = 0.48, η2 = 0.01	F(2, 126) = 0.35, p = 0.71, η2 < 0.01	F(2, 126) = 0.50, p = 0.61, η2 < 0.01
Significance, main effect for groups of words	F(2, 126) = 1.87, p = 0.16, η2 = 0.03	F(2, 126) = 1.59, p = 0.21, η2 = 0.03	F(2, 126) = 262.52, p < 0.01, η2 = 0.81	F(2, 126) = 1.97, p = 0.14, η2 = 0.03	F(2, 126) = 2.36, p = 0.10, η2 = 0.04
Valence and significance interaction	F(4, 126) = 0.96, p = 0.43, η2 = 0.03	F(4, 126) = 0.90, p = 0.47, η2 = 0.03	F(4, 126) = 0.37, p = 0.83, η2 = 0.01	F(4, 126) = 0.43, p = 0.79, η2 = 0.01	F(4, 126) = 0.23, p = 0.92, η2 < 0.01

## Sheet: sheet 5 (ANOVA - significance groups)
Significance - low	Valence	Arousal	Significance	Number of letters	Frequency
Valence, main effect for groups of words	F(2, 126) = 287.76, p < 0.01, η2 = 0.82	F(2, 126) = 2.18, p = 0.12, η2 = 0.03	F(2, 126) = 0.41, p = 0.67, η2 < 0.01	F(2, 126) = 0.27, p = 0.77, η2 < 0.01	F(2, 126) = 0.46, p = 0.63, η2 < 0.01
Arousal, main effect for groups of words	F(2, 126) = 1.32, p = 0.27, η2 = 0.02	F(2, 126) = 299.53, p < 0.01, η2 = 0.83	F(2, 126) = 0.45, p = 0.64, η2 < 0.01	F(2, 126) = 0.48, p = 0.62, η2 < 0.01	F(2, 126) = 1.46, p = 0.24, η2 = 0.02
Valence and arousal interaction	F(4, 126) = 2.31, p = 0.06, η2 = 0.07	F(4, 126) = 0.45, p = 0.78, η2 = 0.01	F(4, 126) = 0.28, p = 0.89, η2 < 0.01	F(4, 126) = 0.57, p = 0.69, η2 = 0.02	F(4, 126) = 1.63, p = 0.17, η2 = 0.05
Significance - medium	Valence	Arousal	Significance	Number of letters	Frequency
Valence, main effect for groups of words	F(2, 126) = 313.61, p < 0.01, η2 = 0.83	F(2, 126) = 0.05, p = 0.95, η2 < 0.01	F(2, 126) = 2.57, p = 0.08, η2 = 0.04	F(2, 126) = 0.51, p = 0.61, η2 < 0.01	F(2, 126) = 0.62, p = 0.54, η2 = 0.01
Arousal, main effect for groups of words	F(2, 126) = 0.99, p = 0.37, η2 = 0.02	F(2, 126) = 271.35, p < 0.01, η2 = 0.81	F(2, 126) = 2.20, p = 0.12, η2 = 0.03	F(2, 126) = 0.21, p = 0.81, η2 < 0.01	F(2, 126) = 0.81, p = 0.45, η2 = 0.01
Valence and arousal interaction	F(4, 126) = 1.29, p = 0.28, η2 = 0.04	F(4, 126) = 1.38, p = 0.25, η2 = 0.04	F(4, 126) = 1.15, p = 0.36, η2 = 0.04	F(4, 126) = 0.53, p = 0.71, η2 = 0.02	F(4, 126) = 1.24, p = 0.30, η2 = 0.04
Significance - high	Valence	Arousal	Significance	Number of letters	Frequency
Valence, main effect for groups of words	F(2, 126) = 294.96, p < 0.01, η2 = 0.82	F(2, 126) = 0.19, p = 0.83, η2 < 0.01	F(2, 126) = 1.09, p = 0.34, η2 = 0.02	F(2, 126) = 1.20, p = 0.31, η2 = 0.02	F(2, 126) = 0.09, p = 0.92, η2 < 0.01
Arousal, main effect for groups of words	F(2, 126) = 1.07, p = 0.35, η2 = 0.02	F(2, 126) = 215.11, p < 0.01, η2 = 0.77	F(2, 126) = 0.18, p = 0.84, η2 < 0.01	F(2, 126) = 0.03, p = 0.97, η2 < 0.01	F(2, 126) = 0.36, p = 0.70, η2 < 0.01
Valence and arousal interaction	F(4, 126) = 1.00, p = 0.41, η2 = 0.03	F(4, 126) = 0.41, p = 0.81, η2 = 0.01	F(4, 126) = 1.46, p = 0.22, η2 = 0.04	F(4, 126) = 0.84, p = 0.50, η2 = 0.03	F(4, 126) = 0.15, p = 0.96, η2 < 0.01

## Sheet: sheet 6 (Descriptive Stats)
Significance Level												Valence Level
		-1								0								1								Total
		-1		0		1		Total		-1		0		1		Total		-1		0		1		Total		-1		0		1		Total		Arousal Level
		M	SD	M	SD	M	SD	M	SD	M	SD	M	SD	M	SD	M	SD	M	SD	M	SD	M	SD	M	SD	M	SD	M	SD	M	SD	M	SD
1	Valence	3.89	0.61	3.67	0.62	4.07	0.55	3.88	0.61	5.14	0.20	5.07	0.22	5.09	0.23	5.09	0.21	6.19	0.49	6.25	0.36	6.25	0.57	6.21	0.48	5.07	1.06	5.00	1.15	5.14	1.01	5.07	1.07
	Arousal	3.38	0.32	4.03	0.14	4.71	0.32	4.04	0.61	3.38	0.17	3.93	0.14	4.80	0.39	4.04	0.65	3.29	0.23	3.97	0.17	4.75	0.65	4.00	0.69	3.35	0.25	3.98	0.15	4.75	0.47	4.03	0.66
	Significance	4.24	0.36	4.23	0.49	4.30	0.28	4.32	0.39	4.21	0.21	4.45	0.49	4.36	0.30	4.34	0.36	4.50	0.40	4.44	0.44	4.35	0.41	4.43	0.41	4.38	0.35	4.38	0.48	4.33	0.33	4.36	0.39
	Number of Letters	8	2.75	7	2.30	7.20	2.37	7.40	2.46	6.60	2.30	7.47	2.07	7.27	2.19	7.02	2.11	6.40	2.10	6.80	1.90	6.87	1.60	6.78	1.93	7	2.45	7.09	2.07	7.11	2.04	7.07	2.18
	Frequency (LN converted)	6.02	2.50	5.49	1.53	5.88	1.25	5.80	1.81	6.11	1.44	5.67	2.16	5.85	1.62	5.91	1.74	5.68	1.43	5.76	1.56	5.74	1.40	5.70	1.43	5.94	1.83	5.64	1.74	5.82	1.40	5.80	1.66
0	Valence	4.08	0.48	3.92	0.52	4.10	0.51	4.03	0.50	5.13	0.19	5.19	0.24	5.05	0.18	5.12	0.21	6.17	0.43	6.04	0.45	6.35	0.46	6.19	0.46	5.13	0.94	5.05	0.97	5.17	1.02	5.11	0.97
	Arousal	3.41	0.31	4.01	0.13	4.70	0.28	4.04	0.59	3.35	0.24	3.95	0.11	4.88	0.43	4.06	0.70	3.29	0.30	4.00	0.20	4.90	0.48	4.06	0.75	3.35	0.28	3.99	0.15	4.83	0.41	4.06	0.68
	Significance	3.58	0.09	3.62	0.16	3.62	0.14	3.61	0.13	3.59	0.16	3.61	0.16	3.59	0.15	3.60	0.15	3.60	0.12	3.65	0.09	3.74	0.14	3.66	0.13	3.59	0.13	3.63	0.14	3.65	0.16	3.62	0.14
	Number of Letters	6.67	1.84	7.20	2.40	7.20	2.04	7.02	2.07	6.67	1.76	6.60	2.23	6.47	2.17	6.58	2.02	6.93	2.22	6.13	2.42	7.13	2.00	6.73	2.21	6.76	1.91	6.64	2.34	6.93	2.05	6.78	2.09
	Frequency (LN converted)	5.35	1.35	5.08	2.08	5.55	1.45	5.33	1.63	5.81	1.61	5.51	1.94	5.48	1.31	5.60	1.61	6.09	1.78	6.25	1.78	4.85	2.25	5.73	2.01	5.75	1.58	5.61	1.95	5.29	1.71	5.55	1.75
-1	Valence	4.30	0.37	3.92	0.48	3.86	0.56	4.02	0.51	5.06	0.22	5.20	0.21	5.12	0.29	5.13	0.24	6.04	0.47	5.99	0.47	6.02	0.32	6.02	0.42	5.13	0.81	5.03	0.95	5.00	0.98	5.06	0.91
	Arousal	3.39	0.28	4.01	0.14	4.77	0.40	4.06	0.64	3.33	0.23	3.94	0.12	4.62	0.37	3.96	0.59	3.25	0.24	3.98	0.17	4.62	0.25	3.95	0.61	3.32	0.25	3.98	0.15	4.67	0.35	3.99	0.61
	Significance	2.99	0.24	3.03	0.25	3.03	0.24	3.02	0.24	3.00	0.24	2.91	0.34	3.03	0.34	2.98	0.31	3.03	0.30	3.01	0.30	3.05	0.28	3.03	0.29	3.01	0.26	2.98	0.29	3.04	0.28	3.01	0.28
	Number of Letters	6.40	2.06	6.73	1.79	6.53	1.60	6.56	1.79	6.07	1.83	6.33	1.68	6.47	2.53	6.29	2.01	6.80	2.70	7.07	2.31	5.87	1.92	6.58	2.34	6.42	2.20	6.71	1.93	6.29	2.03	6.47	2.05
	Frequency (LN converted)	5.20	1.56	4.94	2.07	5.25	1.51	5.13	1.70	4.87	1.70	6.54	1.68	5.01	1.75	5.47	1.84	5.30	1.63	5.48	1.80	5.08	1.74	5.29	1.69	5.12	1.60	5.65	1.94	5.11	1.63	5.30	1.74
Total	Valence	4.09	0.52	3.84	0.54	4.01	0.54	3.98	0.54	5.10	0.20	5.15	0.23	5.09	0.23	5.11	0.22	6.12	0.46	6.09	0.44	6.21	0.47	6.14	0.46	5.11	0.93	5.03	1.02	5.10	1.00	5.08	0.98
	Arousal	3.39	0.30	4.02	0.13	4.73	0.33	4.05	0.61	3.35	0.20	3.94	0.12	4.76	0.41	4.02	0.64	3.28	0.26	3.98	0.18	4.76	0.49	4.00	0.69	3.34	0.26	3.98	0.15	4.75	0.41	4.02	0.65
	Significance	3.66	0.65	3.63	0.59	3.65	0.57	3.65	0.60	3.58	0.53	3.66	0.73	3.66	0.61	3.63	0.63	3.72	0.68	3.70	0.67	3.71	0.61	3.71	0.65	3.66	0.62	3.66	0.66	3.67	0.59	3.66	0.62
	Number of Letters	7.02	2.31	6.98	2.14	6.98	2.01	6.99	2.14	6.34	1.84	6.80	2.02	6.73	2.28	6.63	2.05	6.80	2.37	6.67	2.21	6.62	1.89	6.70	2.15	6.73	2.19	6.81	2.11	6.78	2.05	6.77	2.12
	Frequency (LN converted)	5.52	1.86	5.17	1.88	5.56	1.40	5.42	1.72	5.63	1.65	5.91	1.95	5.45	1.57	5.66	1.73	5.66	1.61	5.83	1.71	5.22	1.83	5.57	1.72	5.60	1.70	5.64	1.86	5.41	1.60	5.55	1.72
